# Supplementary material for: A comprehensive study of Lanthanides based Halide Double Perovskites A₂MTlX₆ for high frequency optical and thermoelectric applications
Source: Research Square preprint supplement (doi:10.21203/rs.3.rs-7585186/v1), 2025-09-24
Supplement: Supplementary file 1 [file 1fe69129ccf06d297e48f519.docx]

**Table S1.** Exhibit the calculated value of Seebeck coefficient S, electrical conductivity , electronic thermal conductivity , lattice thermal conductivity power factor (PF), and figure of merit (ZT) at room temperature (300 K) of A2MTlX6

| **Compounds** |  |  |  |  |  |  |
| --- | --- | --- | --- | --- | --- | --- |
| **K2ScTlCl6** | 230.18 | 1.98 | 0.42 | 1.18 | 1.05 | 0.57 |
| **K2ScTlBr6** | 228.01 | 1.78 | 0.40 | 1.01 | 0.96 | 0.58 |
| **K2ScTlI6** | 244.99 | 1.65 | 0.39 | 0.39 | 0.99 | 0.69 |
| **Rb2ScTlCl6** | 242.38 | 1.69 | 0.38 | 7.69 | 0.98 | 0.25 |
| **Rb2ScTlBr6** | 237.15 | 1.72 | 0.37 | 2.46 | 0.96 | 0.45 |
| **Rb2ScTlI6** | 262.40 | 1.68 | 0.46 | 1.63 | 1.17 | 0.56 |
| **Cs2ScTlCl6** | 236.28 | 2.05 | 0.45 | 3.68 | 1.14 | 0.41 |
| **Cs2ScTlBr6** | 231.62 | 2.06 | 0.44 | 3.09 | 1.09 | 0.43 |
| **Cs2ScTlI6** | 178.37 | 4.71 | 0.62 | 1.21 | 1.49 | 0.61 |
| **K2YTlCl6** | 348.33 | 0.48 | 0.20 | 1.28 | 0.57 | 0.52 |
| **K2YTlBr6** | 229.89 | 1.97 | 0.42 | 0.47 | 1.05 | 0.66 |
| **K2YTlI6** | 238.60 | 1.68 | 0.40 | 0.18 | 1.00 | 0.71 |
| **Rb2YTlCl6** | 233.38 | 1.96 | 0.41 | 4.88 | 1.04 | 0.34 |
| **Rb2YTlBr6** | 235.99 | 1.49 | 0.34 | 2.23 | 0.85 | 0.27 |
| **Rb2YTlI6** | 241.21 | 1.54 | 0.36 | 5.46 | 0.91 | 0.46 |
| **Cs2YTlCl6** | 213.35 | 2.51 | 0.48 | 6.27 | 1.14 | 0.32 |
| **Cs2YTlBr6** | 223.80 | 1.84 | 1.85 | 6.22 | 0.90 | 0.27 |
| **Cs2YTlI6** | 242.82 | 1.62 | 0.2 | 1.84 | 0.96 | 0.50 |
| **K2LaTlCl6** | 248.04 | 1.66 | 0.39 | 0.83 | 1.02 | 0.62 |
| **K2LaTlBr6** | 243.66 | 1.61 | 0.37 | 0.44 | 0.94 | 0.67 |
| **K2LaTlI6** | 203.19 | 2.47 | 0.44 | 0.29 | 1.00 | 0.64 |
| **Rb2LaTlCl6** | 236.28 | 2.03 | 0.42 | 3.27 | 1.07 | 0.42 |
| **Rb2LaTlBr6** | 234.54 | 1.94 | 0.41 | 1.50 | 1.04 | 0.55 |
| **Rb2LaTlI6** | 252.83 | 1.27 | 0.32 | 1.62 | 0.83 | 0.50 |
| **Cs2LaTlCl6** | 224.52 | 2.31 | 0.46 | 2.72 | 1.13 | 0.46 |
| **Cs2LaTlBr6** | 206.24 | 2.68 | 0.48 | 1.62 | 1.14 | 0.52 |
| **Cs2LaTlI6** | 195.35 | 3.83 | 0.66 | 0.98 | 1.48 | 0.58 |
